# Supplementary material
Source: MDPI journal article supplement (https://www.mdpi.com/2227-7102/14/3/264)
Supplement: s1 [file s1]

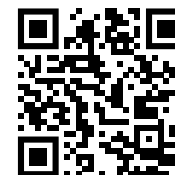

## The Scoring Rubric EVAR

| Subscale                     | Item | Item text                                                                                                  | strongly agree<br>1 | 2 | 3 | strongly disagree<br>4 | no answer | Notes |
|------------------------------|------|------------------------------------------------------------------------------------------------------------|---------------------|---|---|------------------------|-----------|-------|
| Technical Implementation     | 1    | The AR in the learning scenario operates smoothly and reliably.                                            |                     |   |   |                        |           |       |
|                              | 2    | The teachers are confident in controlling the AR.                                                          |                     |   |   |                        |           |       |
|                              | 3    | The handling of the AR is intuitive and simple for the learners.                                           |                     |   |   |                        |           |       |
|                              | 4    | The functionality of the AR is sufficiently described and explained.                                       |                     |   |   |                        |           |       |
|                              | 5    | The tracking method chosen is appropriate for the teaching scenario.                                       |                     |   |   |                        |           |       |
| Fit of the AR                | 6    | The AR supports at least one specific learning goal.                                                       |                     |   |   |                        |           |       |
|                              | 7    | There is a connection to previous and subsequent teaching sequences.                                       |                     |   |   |                        |           |       |
|                              | 8    | Relevant references to real situations or applications are made.                                           |                     |   |   |                        |           |       |
|                              | 9    | The AR offers clear benefits compared to conventional visualizations.                                      |                     |   |   |                        |           |       |
|                              | 10   | Potential benefits and challenges of AR use for teaching are discussed.                                    |                     |   |   |                        |           |       |
|                              | 11   | The AR helps learners to develop a better understanding of the content.                                    |                     |   |   |                        |           |       |
| Interactivity and Engagement | 12   | The AR encourages learners to actively engage with the subject matter.                                     |                     |   |   |                        |           |       |
|                              | 13   | There are additional possibilities besides viewing the object, e.g., interactivity or individualization.   |                     |   |   |                        |           |       |
|                              | 14   | There are feedback mechanisms (analogous or digital) to provide learners with feedback on their use of AR. |                     |   |   |                        |           |       |
| Visualization                | 15   | The complexity of the AR (cf. [1]) fits the learning goal addressed (in terms of cognitive load [2]).      |                     |   |   |                        |           |       |
|                              | 16   | The design laws [3] are taken into account.                                                                |                     |   |   |                        |           |       |
| Creativity and Originality   | 17   | The lesson design demonstrates an original and creative use of AR to support the learning process.         |                     |   |   |                        |           |       |
|                              | 18   | The AR was created by the teachers themselves.                                                             |                     |   |   |                        |           |       |

1. Czok, V.; Krug, M.; Müller, S.; Huwer, J.; Kruse, S.; Müller, W.; Weitzel, H. A Framework for Analysis and Development of Augmented Reality Applications in Science and Engineering Teaching. *Education Sciences* **2023**, *13*, 926.
2. Sweller, J. Implications of Cognitive Load Theory for Multimedia Learning. *The Cambridge Handbook of Multimedia Learning* **2005**.
3. Mayer, R.E. *The Cambridge Handbook of Multimedia Learning*, Second ed.; Cambridge University Press: Cambridge, 2014.
